# Supplementary material for: Modulation of the electronic band structure of silicene by polar two-dimensional substrates
Source: Royal Society of Chemistry journal article supplement (doi:10.1039/d0cp03486j), 2020-01-01
Supplement: d0cp03486j1.pdf [file d0cp03486j1.pdf]

## Supplementary material

### Modulation of electronic band structure of silicene by polar two-dimensional substrates

Table.S1. the exfoliation energy ( $E_{\text{exf}}$ ) and band gap of Si/Janus

| Species                                     | Band gap(eV)  | $E_{\text{exf}}(\text{meV}/\text{\AA}^2)$ |
|---------------------------------------------|---------------|-------------------------------------------|
| $\text{Ga}_2\text{SSe}(\text{S}/\text{Se})$ | 0.1360/0.1680 | 15/19                                     |
| $\text{In}_2\text{SSe}(\text{S}/\text{Se})$ | 0.1437/0.1379 | 16/16                                     |
| $\text{GaInS}_2(\text{Ga}/\text{In})$       | 0.1539/0.1790 | 15/17                                     |

Table.S2. The elastic constants of structure. The unit is N/m

| Structure                         | $C_{11}$ | $C_{12}$ | $C_{66}$ |
|-----------------------------------|----------|----------|----------|
| $\text{Ga}_2\text{SSe}/\text{S}$  | 133.22   | 35.79    | 1.07     |
| $\text{Ga}_2\text{SSe}/\text{Se}$ | 132.57   | 35.48    | 1.25     |
| $\text{In}_2\text{SSe}/\text{S}$  | 121.93   | 37.40    | 1.31     |
| $\text{In}_2\text{SSe}/\text{Se}$ | 119.57   | 37.99    | 2.83     |
| $\text{GaInS}_2/\text{Ga}$        | 126.46   | 36.59    | 1.19     |
| $\text{GaInS}_2/\text{In}$        | 125.70   | 36.53    | 2.11     |

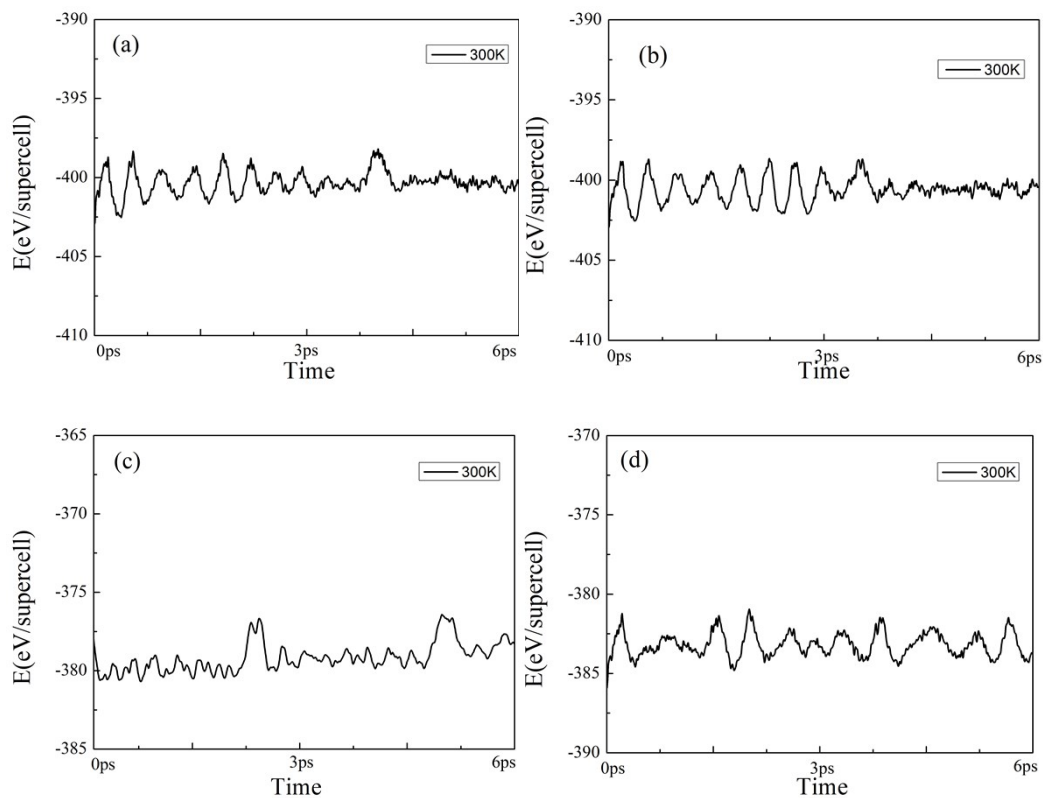

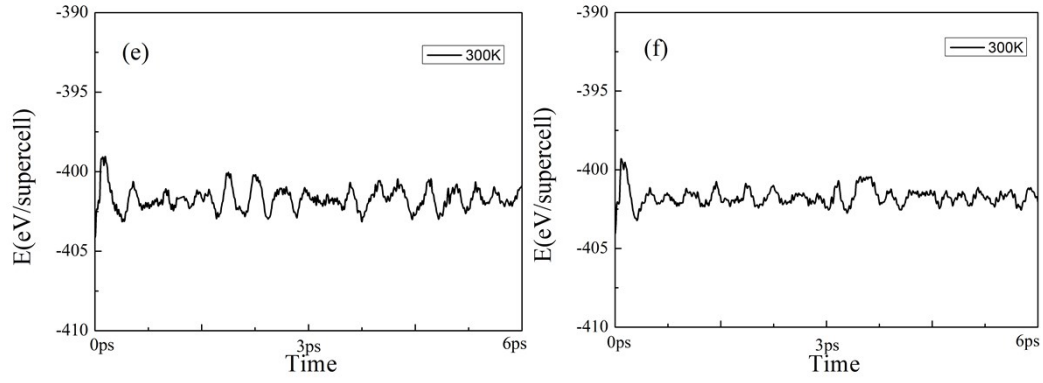

Figure.S1. Energy fluctuations of (a) Si/Ga<sub>2</sub>SSe-S, (b) Si/Ga<sub>2</sub>SSe-Se, (c) Si/In<sub>2</sub>SSe-S, (d) Si/In<sub>2</sub>SSe-Se, (e) Si/GaInS<sub>2</sub>-Ga, (f) Si/GaInS<sub>2</sub>-In during MD simulations at 300K.

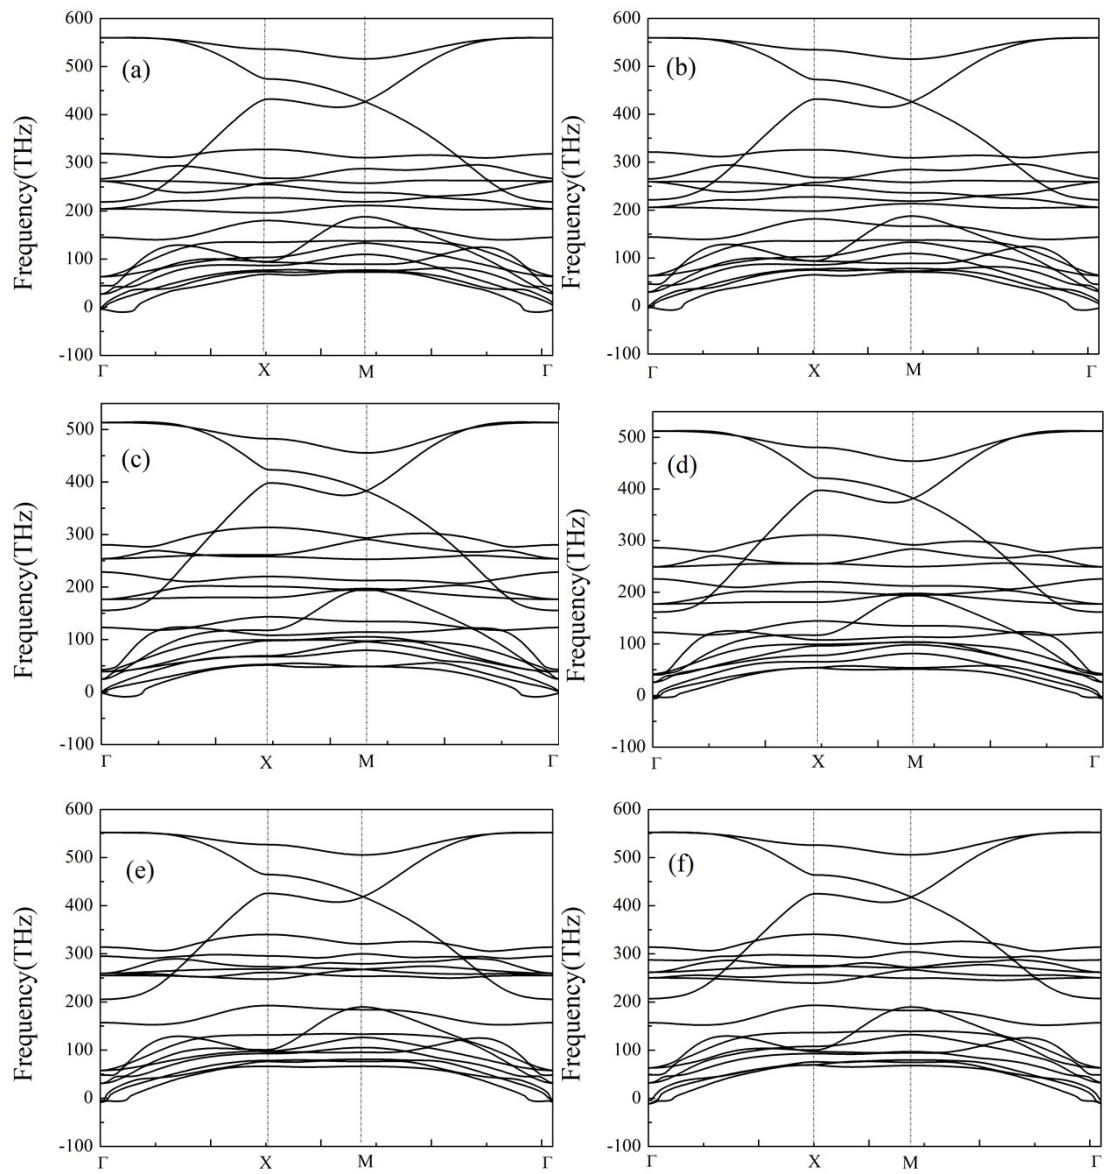

Figure.S2. Phonon spectrum of (a) Si/Ga<sub>2</sub>SSe-S, (b) Si/Ga<sub>2</sub>SSe-Se, (c) Si/In<sub>2</sub>SSe-S, (d) Si/In<sub>2</sub>SSe-Se, (e) Si/GaInS<sub>2</sub>-Ga, (f) Si/GaInS<sub>2</sub>-In.

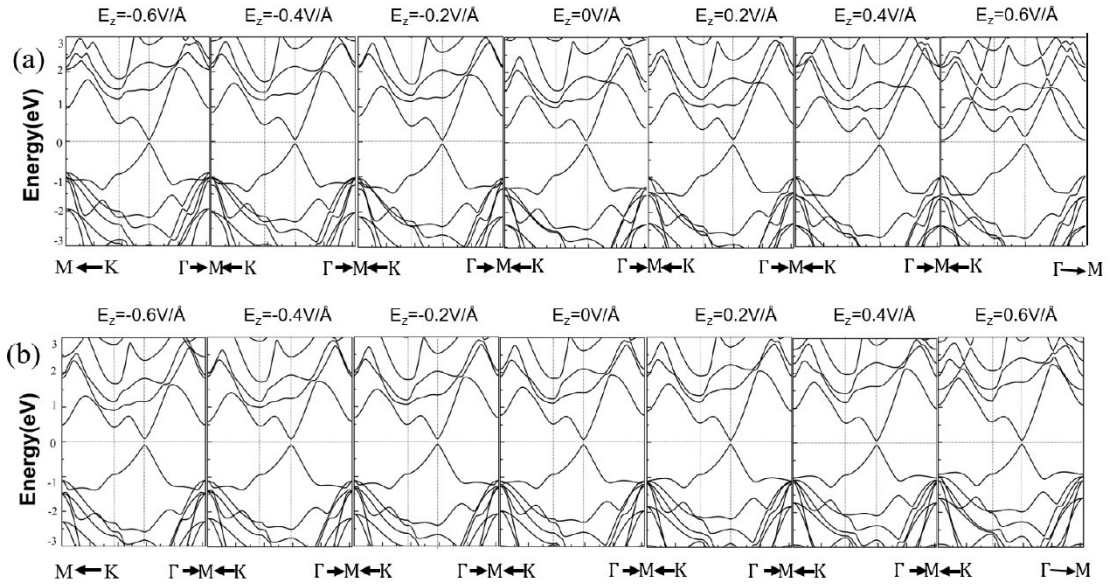

Figure.S3. Band structures near the Fermi levels of (a) the Si/In<sub>2</sub>SSe heterojunction with Si/S interface and (b) the Si/In<sub>2</sub>SSe heterojunction with Si/Se interface under different electric fields  $E_z$

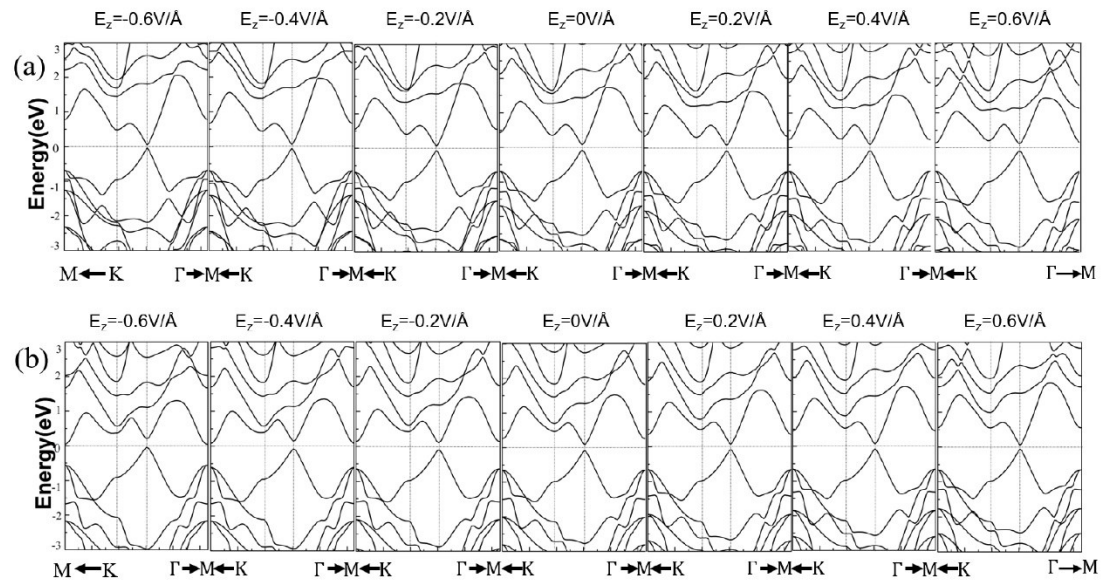

Figure.S4. Band structures near the Fermi levels of (a) the Si/GaInS<sub>2</sub> heterojunction with Si/Ga interface and (b) the Si/GaInS<sub>2</sub> heterojunction with Si/In interface under different electric fields  $E_z$ .
